# Supplementary material
Source: PubMed Central journal article supplement (PMC4979687)

# Supplement Figure 1

## a MC1

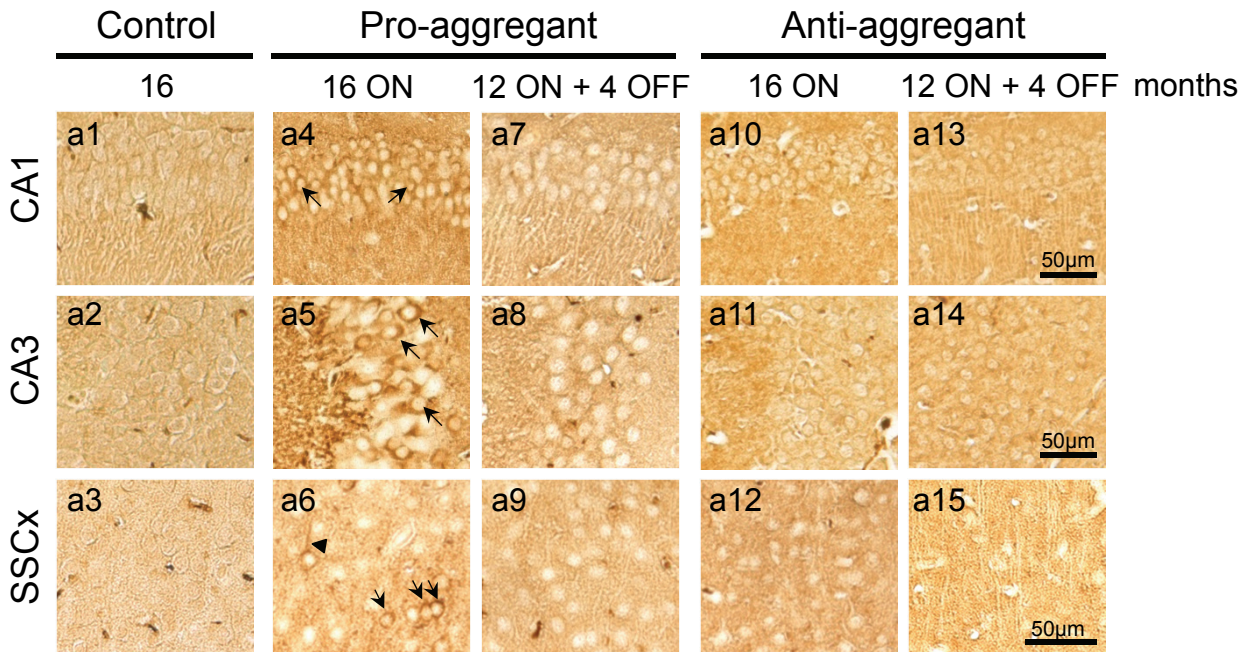

## b 12E8

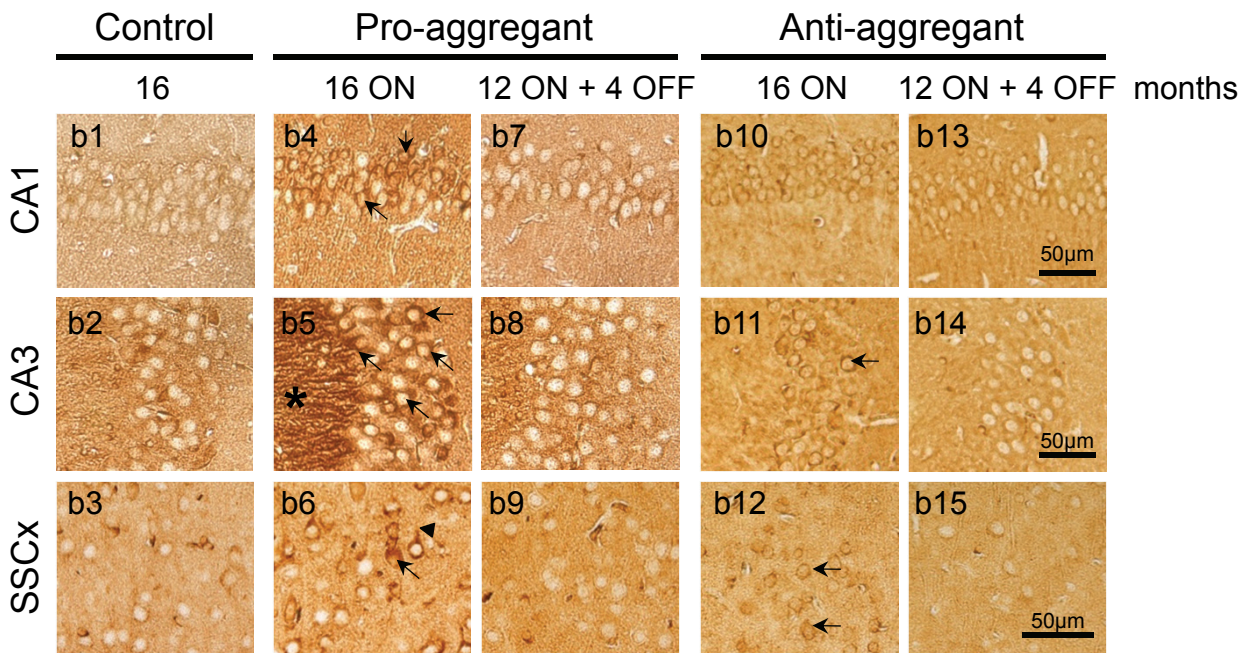



## Supplement Figure 2

### a PHF-1

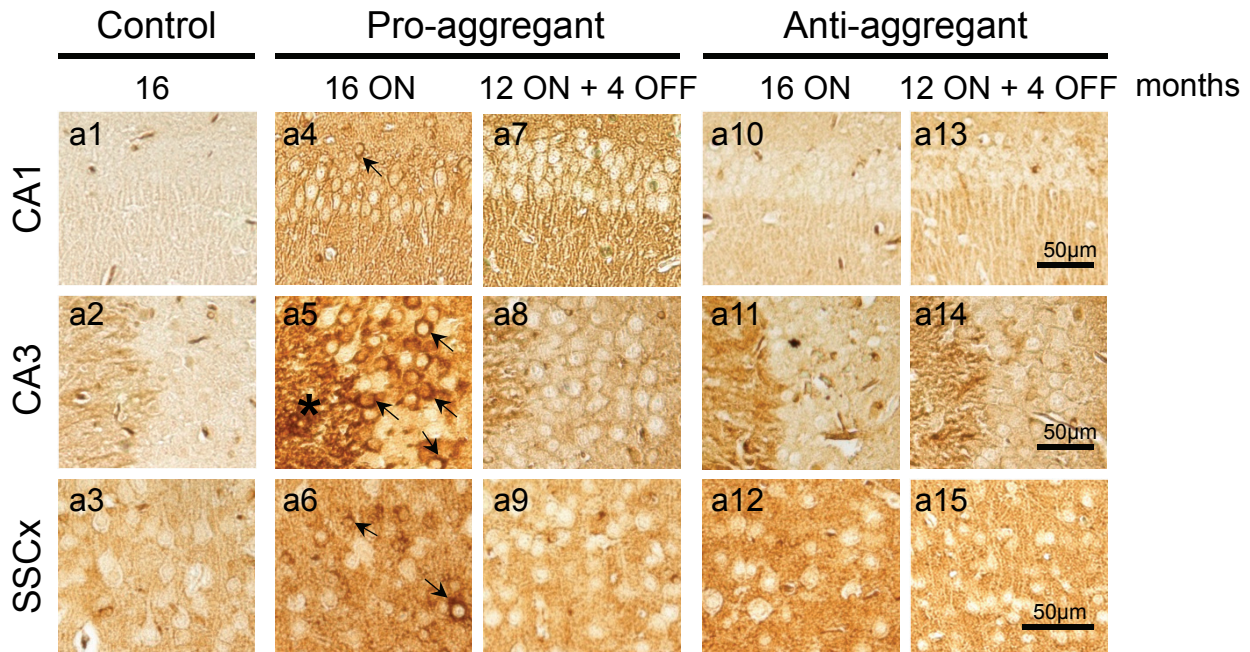

### b AT180

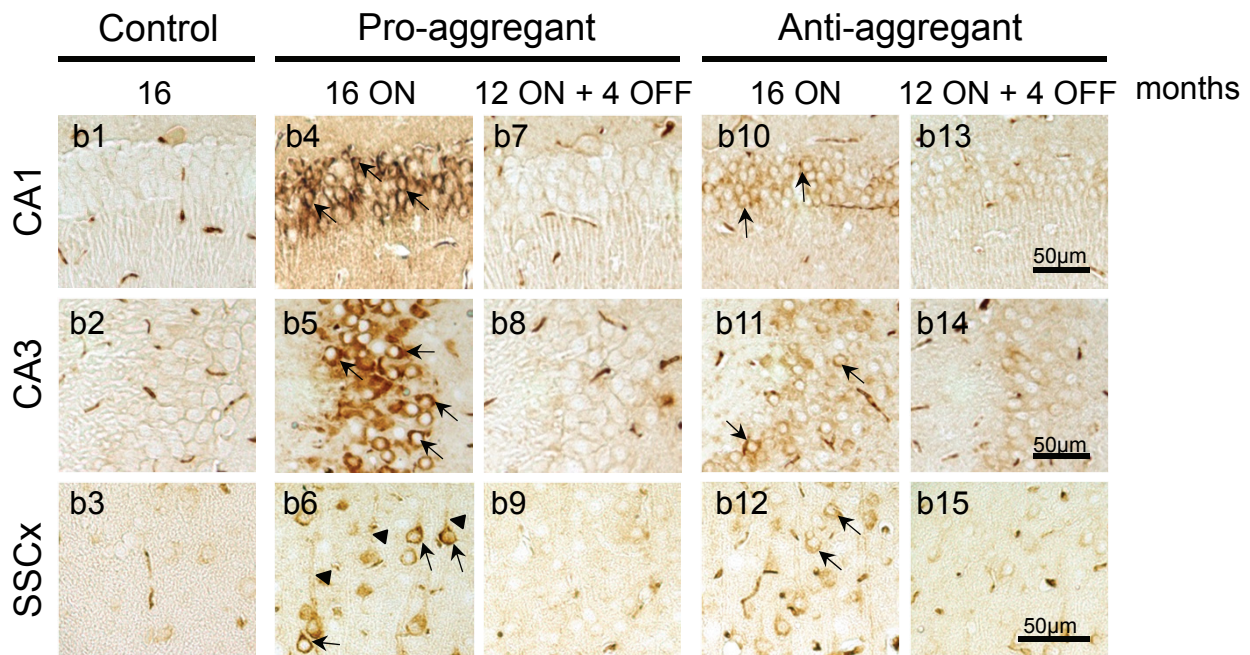

Supplement Figure 3

**a** Sarcosyl-soluble fraction

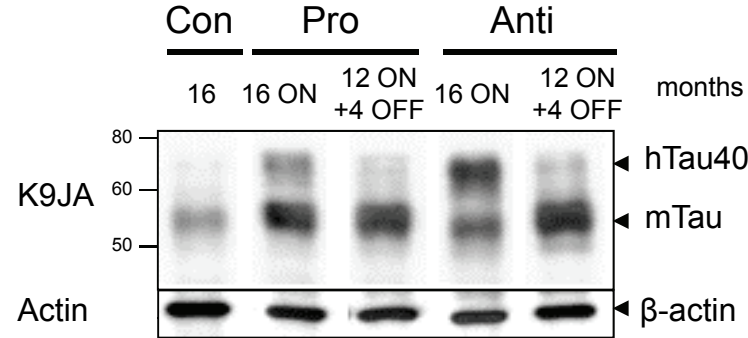

**b** Sarcosyl-insoluble fraction

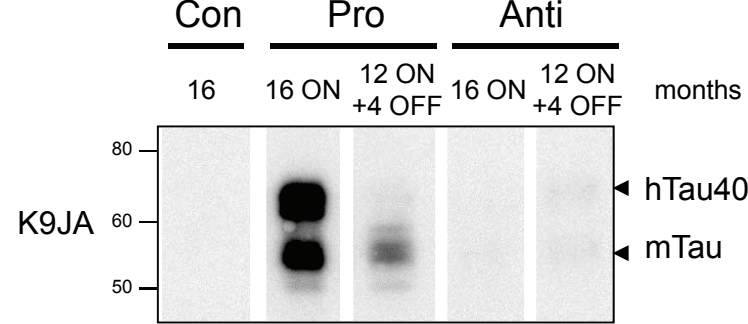

# Supplement Figure 4

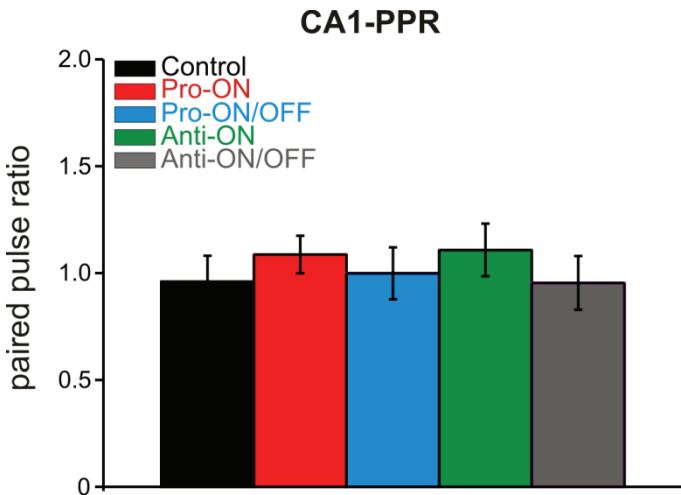

# Supplement Figure 5

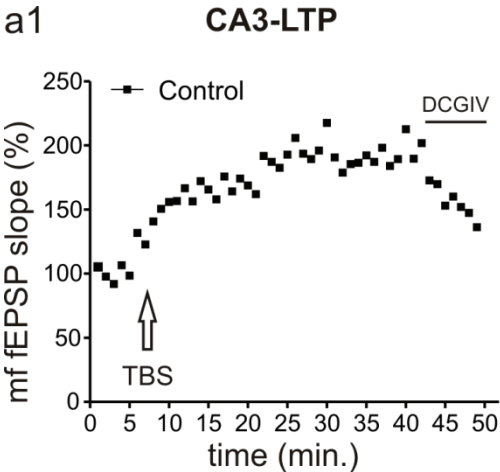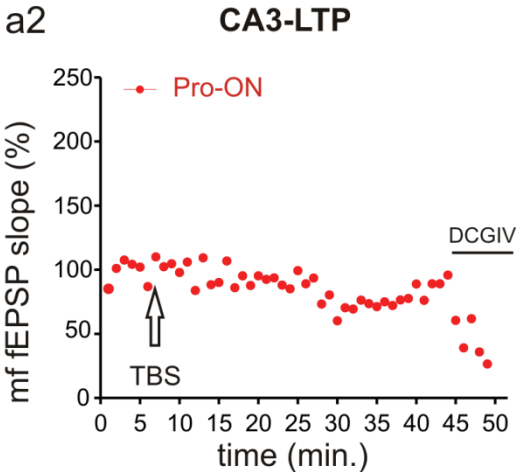

Supplement: NIHMS69377-supplement-Supplemental_Figures.pdf [file NIHMS69377-supplement-Supplemental_Figures.pdf]
